# Supplementary material for: Synthesis of Isatin Derivatives Using Silver Nanoparticles as Green Catalyst: Study of Molecular Docking Interactions in SARS-CoV-2 3c-Like Protease and Determination of Cytotoxic Activities of the Compounds
Source: Hindawi journal article supplement (doi:10.1155/2021/7241699), 2021-10-04

**Supplementary Information**

**Synthesis of isatin derivatives using silver nanoparticles as green catalyst: Study of molecular docking interactions in SARS-CoV-2 3C-like protease and determination of cytotoxic activities of the compounds**

PonnusamyPackialakshmi1, PerumalGobinath1, Kaliappillai Vijayakumar2, Daoud Ali3, Saud Alarifi3, Ravindran Balasubramani4, PitchaiSangan5 and RadhakrishnanSurendrakumar1*

Content

1H-NMR Spectrum of compound- 2-17

13C-NMR Spectrum of the compound 18-33

1H NMR

Compound – 1


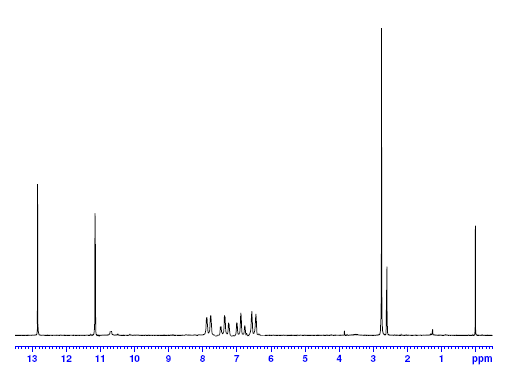


1H NMR

Compound – 2


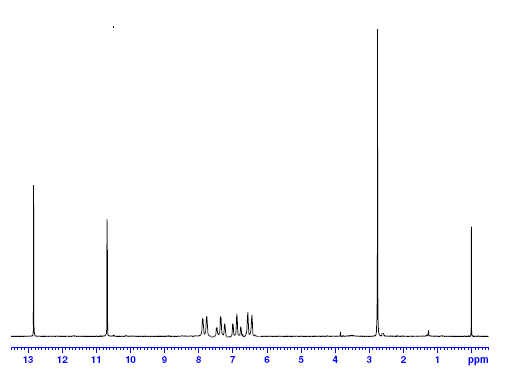


1H NMR

Compound – 3a


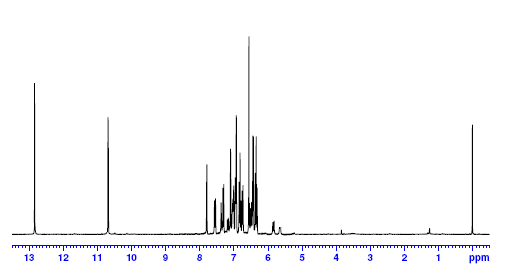


1H NMR

Compound – 3b


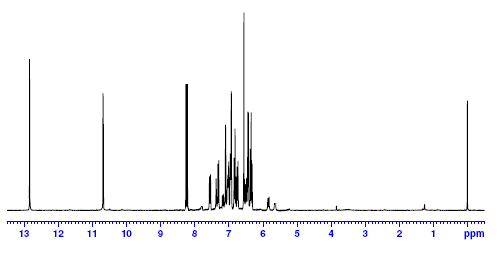


1H NMR

Compound – 3c


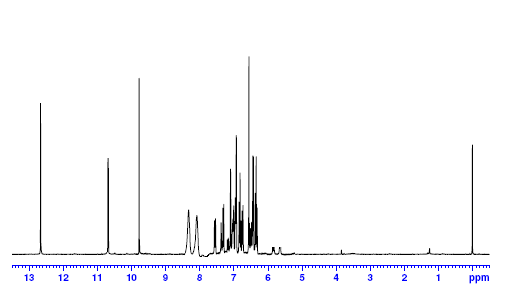


1H NMR

Compound – 3d


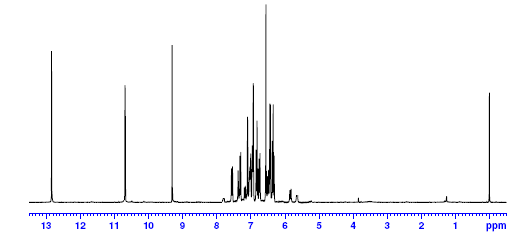


1H NMR

Compound – 3e


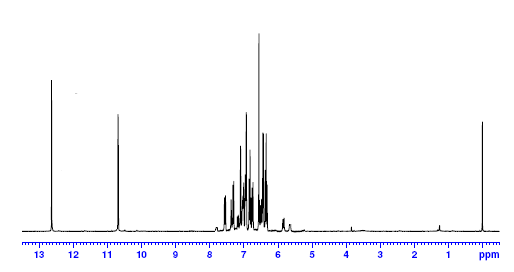


1H NMR

Compound -3f


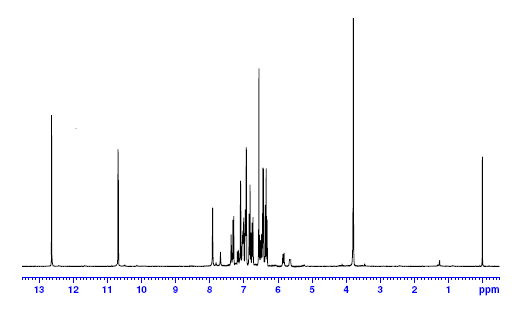


1H NMR

Compound -3g


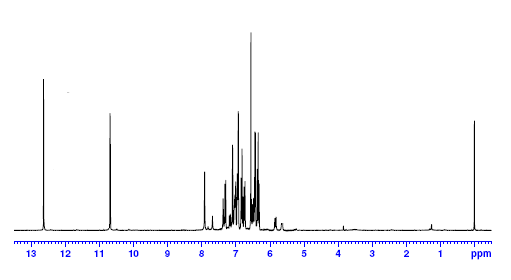


1H NMR

Compound – 3h


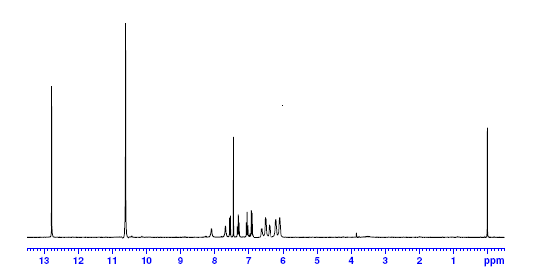


1H NMR

Compound – 3i


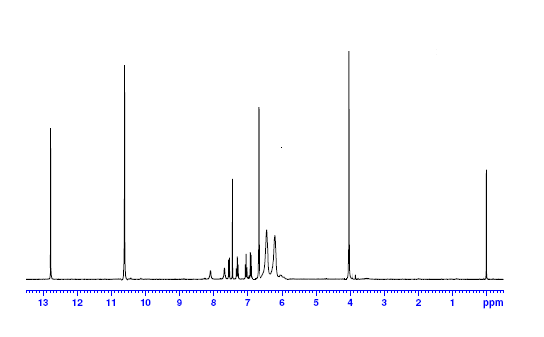


1H NMR

Compound – 3j


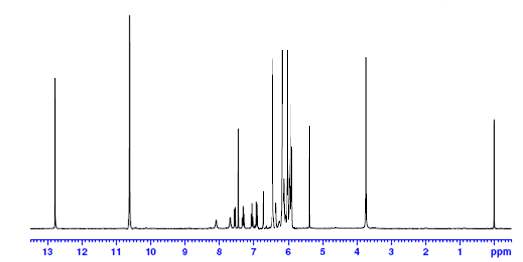


1H NMR

Compound – 3k


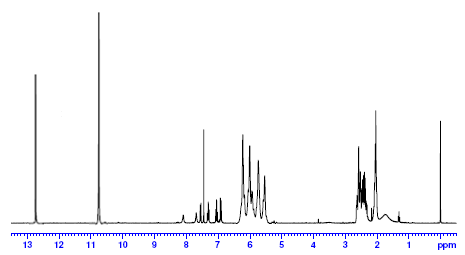


1H NMR

Compound – 3l


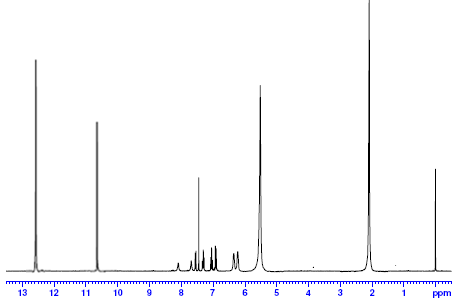


1H NMR

Compound – 3m


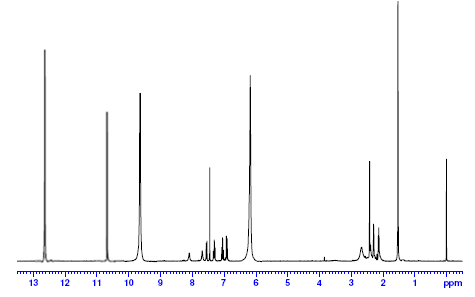


1H NMR

Compound – 3n


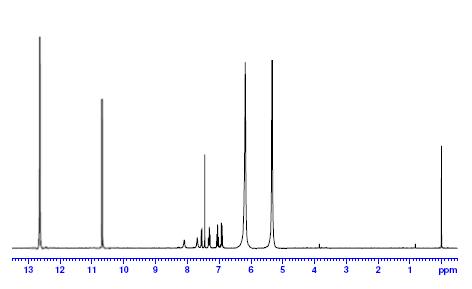


13C NMR

Compound – 1


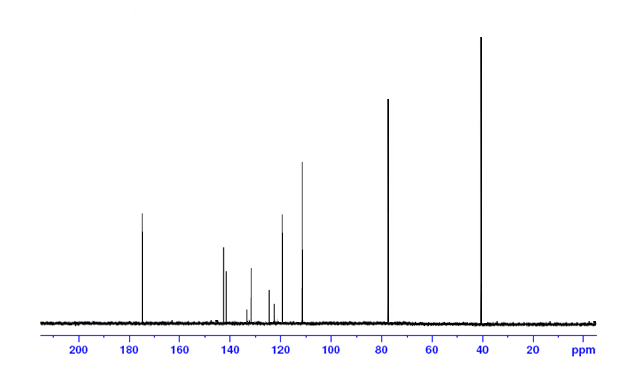


13C NMR

Compound – 2


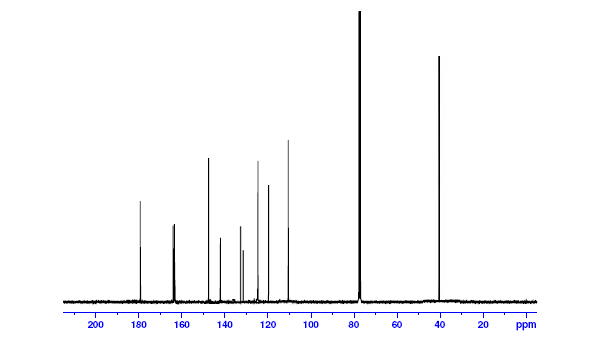


13C NMR

Compound – 3a


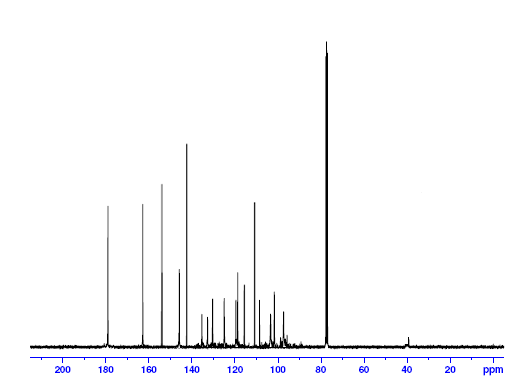


13C NMR

Compound – 3b


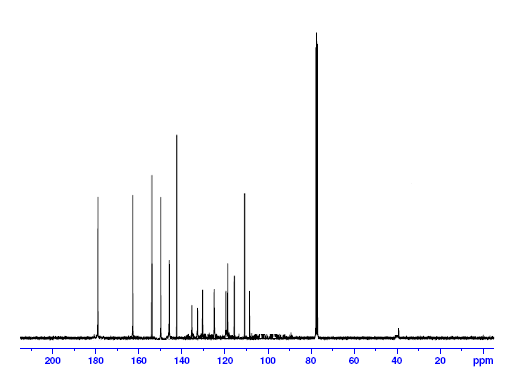


13C NMR

Compound – 3c


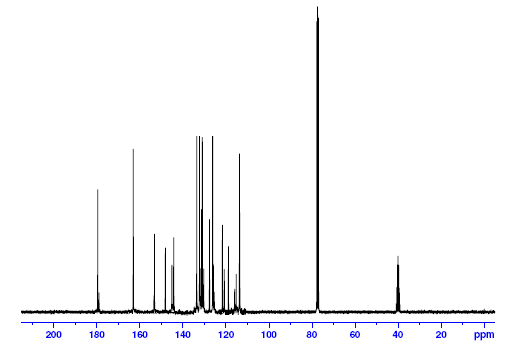


13C NMR

Compound – 3d


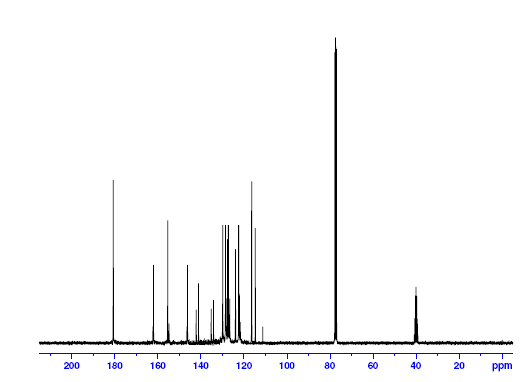


13C NMR

Compound – 3e


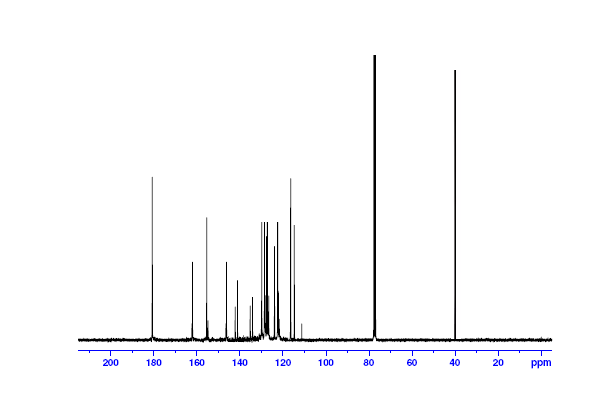


13C NMR

Compound – 3f


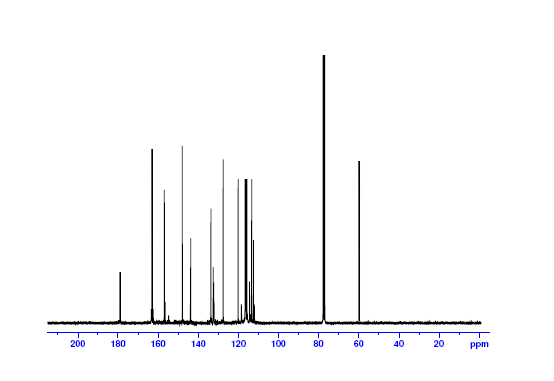


13C NMR

Compound – 3g


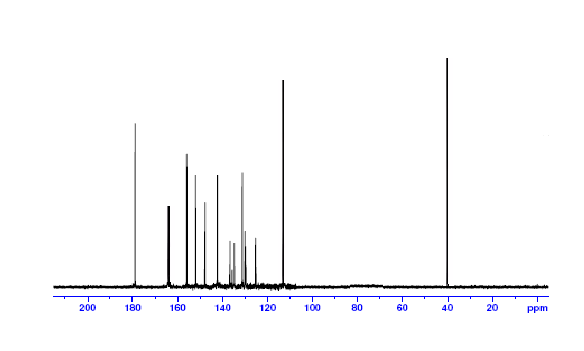


13C NMR

Compound-3h


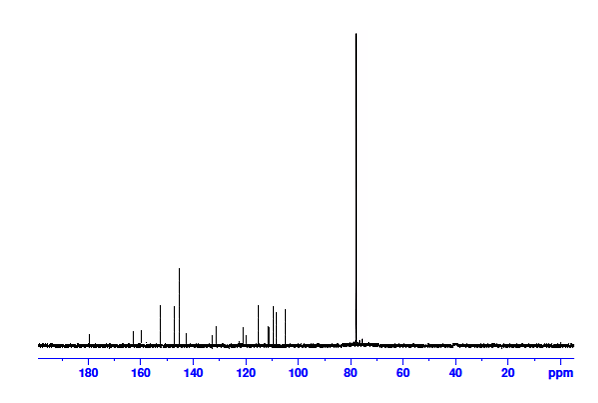


13C NMR

Compound-3i


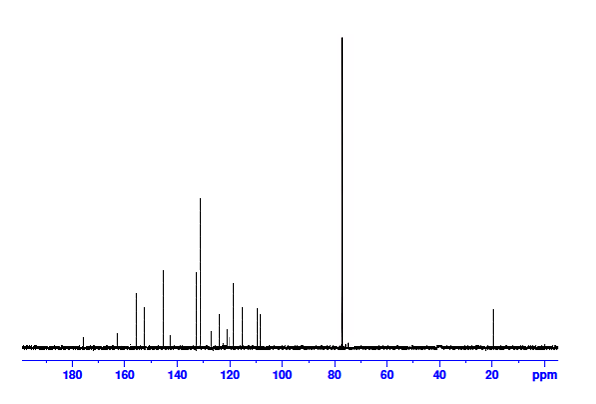


13C NMR

Compound-3j


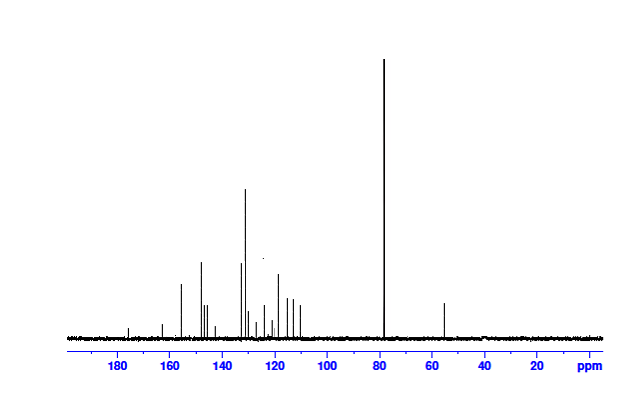


13C NMR

Compound-3k


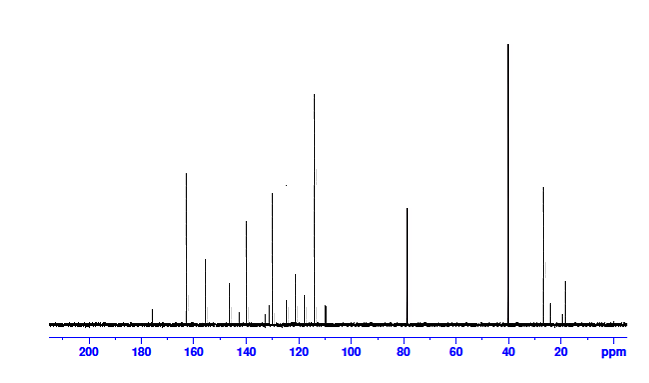


13C NMR

Compound-3l


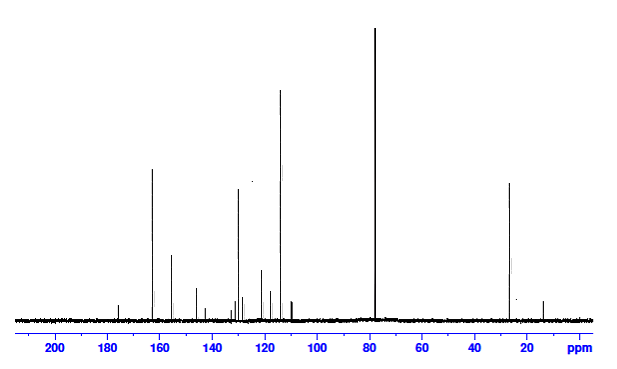


13C NMR

Compound-3m


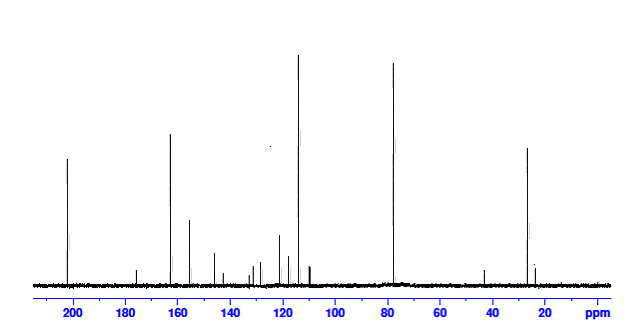


13C NMR

Compound-3n


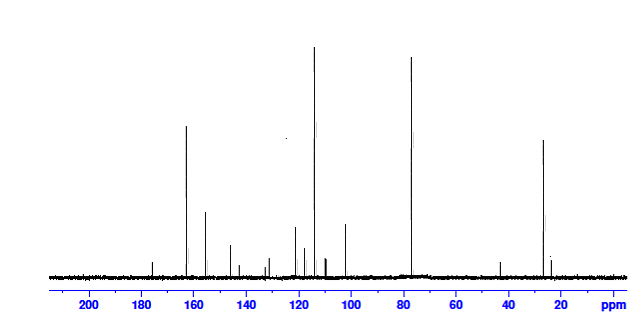

Supplement: f1 [file 7241699.f1.docx]
